# Supplementary material for: Continuous Glucose Monitoring in Preterm Infants: The Role of Nutritional Management in Minimizing Glycemic Variability
Source: MDPI journal article supplement (doi:10.3390/antiox11101945), 2022-09-29
Supplement: s1 [file s1]

| ID n° | Sex | Birth Weight<br>(g) | Centile<br>InesChart | GA<br>(weeks) | Weight<br>for GA | Breath<br>support | Full feed<br>(weeks) | Weight<br>FEF<br>(g) | Mean<br>glucose<br>(mg/dL) | Glucose<br>SD<br>(mg/dL) | % time<br>hypoglycemia<br>(<60 mg/dL)<br>(%) | % time<br>hyperglycemia<br>(>150 mg/dL)<br>(%) | MAGE<br>(mg/dL) |
|-------|-----|---------------------|----------------------|---------------|------------------|-------------------|----------------------|----------------------|----------------------------|--------------------------|----------------------------------------------|------------------------------------------------|-----------------|
| 1     | M   | 1580                | 95                   | 29.28         | LGA              | 0                 | 32                   | 1845                 | 97.1                       | 5.7                      | 0                                            | 0                                              | 0               |
| 2     | F   | 910                 | 21                   | 29            | AGA              | 0                 | 32.56                | 1230                 | 95.2                       | 13.16                    | 1.2                                          | 0                                              | 28.75           |
| 3     | M   | 1450                | 86                   | 29.28         | AGA              | 0                 | 32                   | 1820                 | 84.6                       | 14.5                     | 3.3                                          | 0                                              | 15.44           |
| 4     | F   | 980                 | 31                   | 28.85         | AGA              | 0                 | 32.7                 | 1325                 | 82.1                       | 7.14                     | 0                                            | 0                                              | 0               |
| 5     | M   | 960                 | 60                   | 27            | AGA              | 1                 | 32.84                | 1350                 | 87.3                       | 17                       | 1.3                                          | 0.6                                            | 19.33           |
| 6     | F   | 1325                | 42                   | 30.86         | AGA              | 0                 | 33.28                | 1505                 | 80.6                       | 8.8                      | 0                                            | 0                                              | 4               |
| 7     | F   | 900                 | 92                   | 25.28         | LGA              | 1                 | 34                   | 1685                 | 86.5                       | 15.2                     | 2.8                                          | 0.68                                           | 57.5            |
| 8     | M   | 1635                | 26                   | 32.86         | AGA              | 0                 | 35.42                | 1720                 | 76.9                       | 12.7                     | 8.9                                          | 0                                              | 0               |
| 9     | M   | 1650                | 69                   | 31.14         | AGA              | 0                 | 36.42                | 2175                 | 78.8                       | 9.96                     | 3.7                                          | 0                                              | 0               |
| 10    | F   | 980                 | 7                    | 31            | SGA              | 0                 | 34.56                | 1255                 | 68.8                       | 14.3                     | 22                                           | 0                                              | 26.46           |

Supplementary table S1

| ID n° | Sex | Birth Weight | Centile InesChart | GA      | Weight for GA | Breath support | Full feed | Weight FEF | Mean glucose | Glucose SD | % time hypoglycemia (<60 mg/dL) | % time hyperglycemia (>150 mg/dL) | MAGE    |
|-------|-----|--------------|-------------------|---------|---------------|----------------|-----------|------------|--------------|------------|---------------------------------|-----------------------------------|---------|
|       |     | (g)          |                   | (Weeks) |               |                | (Weeks)   | (g)        | (mg/dL)      | (mg/dL)    | (%)                             | (%)                               | (mg/dL) |
| 11    | F   | 1540         | 50                | 31.7    | AGA           | 0              | 33.84     | 1590       | 82           | 7.2        | 0.24                            | 0                                 | 0       |
| 12    | F   | 2150         | 91                | 32.56   | LGA           | 0              | 33.84     | 1915       | 77.6         | 7.8        | 0.64                            | 0                                 | 0       |
| 13    | M   | 1380         | 19                | 31.7    | AGA           | 0              | 34        | 1780       | 89.4         | 10.15      | 0                               | 0                                 | 0       |
| 14    | F   | 1900         | 26                | 34      | AGA           | 0              | 35.28     | 1700       | 90           | 13.1       | 1.68                            | 0                                 | 7       |
| 15    | M   | 2445         | 92                | 33.28   | LGA           | 0              | 35.28     | 2540       | 97.2         | 10.16      | 0                               | 0                                 | 0       |
| 16    | F   | 1210         | 3                 | 33.28   | SGA           | 0              | 35.7      | 1240       | 84.16        | 13.6       | 1.68                            | 0                                 | 0       |
| 17    | F   | 1780         | 22                | 33.84   | AGA           | 0              | 35.7      | 1745       | 79.45        | 15         | 9.15                            | 0                                 | 17      |
| 18    | M   | 1790         | 75                | 31.56   | AGA           | 0              | 33.7      | 2030       | 85.46        | 11         | 0                               | 0                                 | 9       |
| 19    | M   | 1470         | 68                | 30.28   | AGA           | 1              | 33.56     | 1555       | 94.9         | 6.19       | 0                               | 0                                 | 0       |
| 20    | F   | 1800         | 23                | 33.84   | AGA           | 0              | 35.84     | 1890       | 80.22        | 12.23      | 4.78                            | 0                                 | 12.75   |

Supplementary table S2
